# Supplementary material for: Dental status and cause-specific mortality in older adults
Source: Research Square preprint supplement (doi:10.21203/rs.3.rs-6962054/v1), 2025-07-28
Supplement: Supplementary file 1 [file 49800848a15bdec4e9eb1195.docx]

# Title: Dental status and cause-specific mortality in older adults

Authors: Faiz Abdurrahman, Taro Kusama, Yudai Tamada, Sakura Kiuchi, Masashige Saito, Toshiyuki Ojima, Jun Aida, Katsunori Kondo, Ken Osaka, Kenji Takeuchi.

**Supplementary table legends**

- **Supplementary Table S1. Baseline characteristics of participants by number of remaining teeth before multiple imputation.**
- **Supplementary Table S2. Baseline characteristics of participants by dental status before multiple imputation.**
- **Supplementary Table S3. Baseline characteristics of participants by dental status after multiple imputation.**
- **Supplementary Table S4. All-cause and cause-specific mortality rates by number of remaining teeth (n = 43,774).**
- **Supplementary Table S5. Association between number of remaining teeth and all-cause and cause-specific mortality in complete-case analyses (n = 21,829).**
- **Supplementary Table S6. Association between dental status and all-cause and cause-specific mortality in complete-case analyses (n = 21,829).**

**Supplementary Table S1. Baseline characteristics of participants by number of remaining teeth before multiple imputation.**

|  | **All participants (*n* = 43,774)** | | **Number of remaining teeth** | | | | | | | |
| --- | --- | --- | --- | --- | --- | --- | --- | --- | --- | --- |
|  | **≥20 teeth**  **(*n* = 15,067)** | | **10–19 teeth**  **(*n* = 11,058)** | | **0–9 teeth**  **(*n* = 16,142)** | | **Missing** | |
|  | ***n*** | **%** | ***n*** | **%** | ***n*** | **%** | ***n*** | **%** | ***n*** | **%** |
| **Sex** |  |  |  |  |  |  |  |  |  |  |
| Men | 20,493 | 46.8 | 7,263 | 48.2 | 5,252 | 47.5 | 7,363 | 45.6 | 615 | 40.8 |
| Women | 23,281 | 53.2 | 7,804 | 51.8 | 5,806 | 52.5 | 8,779 | 54.4 | 892 | 59.2 |
| **Age (years)** |  |  |  |  |  |  |  |  |  |  |
| 65–69 | 13,006 | 29.7 | 5,880 | 39.0 | 3,716 | 33.6 | 3,066 | 19.0 | 344 | 22.8 |
| 70–74 | 13,098 | 29.9 | 4,998 | 33.2 | 3,454 | 31.2 | 4,224 | 26.2 | 422 | 28.0 |
| 75–79 | 9,748 | 22.3 | 2,770 | 18.4 | 2,359 | 21.3 | 4,238 | 26.3 | 381 | 25.3 |
| 80–84 | 5,462 | 12.5 | 1,107 | 7.3 | 1,152 | 10.4 | 2,949 | 18.3 | 254 | 16.9 |
| ≥85 | 2,460 | 5.6 | 312 | 2.1 | 377 | 3.4 | 1,665 | 10.3 | 106 | 7.0 |
| **Income (million JPY)** |  |  |  |  |  |  |  |  |  |  |
| <2.00 | 17,910 | 40.9 | 5,438 | 36.1 | 4,561 | 41.2 | 7,348 | 45.5 | 563 | 37.4 |
| 2.00–3.99 | 14,391 | 32.9 | 5,944 | 39.5 | 3,746 | 33.9 | 4,280 | 26.5 | 421 | 27.9 |
| ≥4.00 | 4,065 | 9.3 | 1,776 | 11.8 | 1,006 | 9.1 | 1,149 | 7.1 | 134 | 8.9 |
| Missing | 7,408 | 16.9 | 1,909 | 12.7 | 1,745 | 15.8 | 3,365 | 20.8 | 389 | 25.8 |
| **Education (years)** |  |  |  |  |  |  |  |  |  |  |
| ≤9 | 19,401 | 44.3 | 5,347 | 35.5 | 4,723 | 42.7 | 8,688 | 53.8 | 643 | 42.7 |
| 10–12 | 15,338 | 35.0 | 5,936 | 39.4 | 4,077 | 36.9 | 4,852 | 30.1 | 473 | 31.4 |
| ≥13 | 8,021 | 18.3 | 3,524 | 23.4 | 2,048 | 18.5 | 2,151 | 13.3 | 298 | 19.8 |
| Missing | 1,014 | 2.3 | 260 | 1.7 | 210 | 1.9 | 451 | 2.8 | 93 | 6.2 |
| **Comorbidities** |  |  |  |  |  |  |  |  |  |  |
| 0 | 109 | 0.2 | 36 | 0.2 | 24 | 0.2 | 43 | 0.3 | 6 | 0.4 |
| 1 | 14,111 | 32.2 | 5,036 | 33.4 | 3,606 | 32.6 | 4,986 | 30.9 | 483 | 32.1 |
| ≥2 | 19,228 | 43.9 | 6,198 | 41.1 | 4,764 | 43.1 | 7,592 | 47.0 | 674 | 44.7 |
| Missing | 10,326 | 23.6 | 3,797 | 25.2 | 2,664 | 24.1 | 3,521 | 21.8 | 344 | 22.8 |
| **Smoking status** |  |  |  |  |  |  |  |  |  |  |
| Never | 23,390 | 53.4 | 8,801 | 58.4 | 5,985 | 54.1 | 8,165 | 50.6 | 439 | 29.1 |
| Former | 11,731 | 26.8 | 4,204 | 27.9 | 3,085 | 27.9 | 4,309 | 26.7 | 133 | 8.8 |
| Current | 4,481 | 10.2 | 1,145 | 7.6 | 1,203 | 10.9 | 2,069 | 12.8 | 64 | 4.2 |
| Missing | 4,172 | 9.5 | 917 | 6.1 | 785 | 7.1 | 1,599 | 9.9 | 871 | 57.8 |
| **Alcohol Consumption** |  |  |  |  |  |  |  |  |  |  |
| Never | 24,813 | 56.7 | 8,067 | 53.5 | 6,194 | 56.0 | 10,022 | 62.1 | 530 | 35.2 |
| Past | 1,435 | 3.3 | 433 | 2.9 | 395 | 3.6 | 597 | 3.7 | 10 | 0.7 |
| Current | 14,996 | 34.3 | 6,060 | 40.2 | 4,064 | 36.8 | 4,715 | 29.2 | 157 | 10.4 |
| Missing | 2,530 | 5.8 | 507 | 3.4 | 405 | 3.7 | 808 | 5.0 | 810 | 53.7 |
| **Marital status** |  |  |  |  |  |  |  |  |  |  |
| With a spouse | 31,131 | 71.1 | 11,687 | 77.6 | 8,050 | 72.8 | 10,394 | 64.4 | 1,000 | 66.4 |
| Without a spouse | 11,711 | 26.8 | 3,177 | 21.1 | 2,802 | 25.3 | 5,283 | 32.7 | 449 | 29.8 |
| Missing | 932 | 2.1 | 203 | 1.3 | 206 | 1.9 | 465 | 2.9 | 58 | 3.8 |
| **Walking time (min/day)** |  |  |  |  |  |  |  |  |  |  |
| ≥60 | 12,925 | 29.5 | 4,961 | 32.9 | 3,305 | 29.9 | 4,254 | 26.4 | 405 | 26.9 |
| 30–59 | 14,604 | 33.4 | 5,363 | 35.6 | 3,810 | 34.5 | 4,980 | 30.9 | 451 | 29.9 |
| <30 | 13,626 | 31.1 | 4,007 | 26.6 | 3,304 | 29.9 | 5,850 | 36.2 | 465 | 30.9 |
| Missing | 2,619 | 6.0 | 736 | 4.9 | 639 | 5.8 | 1,058 | 6.6 | 186 | 12.3 |
| **Body mass index** |  |  |  |  |  |  |  |  |  |  |
| <18.5 | 3,047 | 7.0 | 904 | 6.0 | 675 | 6.1 | 1,331 | 8.2 | 137 | 9.1 |
| 18.5–29.9 | 38,490 | 87.9 | 13,666 | 90.7 | 9,905 | 89.6 | 13,682 | 84.8 | 1,237 | 82.1 |
| ≥30.0 | 855 | 2.0 | 266 | 1.8 | 196 | 1.8 | 363 | 2.2 | 30 | 2.0 |
| Missing | 1,382 | 3.2 | 231 | 1.5 | 282 | 2.6 | 766 | 4.7 | 103 | 6.8 |

**Supplementary Table S2. Baseline characteristics of participants by dental status before multiple imputation.**

|  | **All participants (*n* = 43,774)** | | **Dental status** | | | | | | | | | | | |
| --- | --- | --- | --- | --- | --- | --- | --- | --- | --- | --- | --- | --- | --- | --- |
|  | **≥20 teeth**  **(*n* = 15,067)** | | **10–19 teeth with dental prostheses**  **(*n* = 6,542)** | | **10–19 teeth without dental prostheses**  **(*n* = 3,689)** | | **0–9 teeth with dental prostheses**  **(*n* = 10,577)** | | **0–9 teeth without dental prostheses**  **(*n* = 4,037)** | | **Missing** | |
|  | ***n*** | **%** | ***n*** | **%** | ***n*** | **%** | ***n*** | **%** | ***n*** | **%** | ***n*** | **%** | ***n*** | **%** |
| **Sex** |  |  |  |  |  |  |  |  |  |  |  |  |  |  |
| Men | 20,493 | 46.8 | 7,263 | 48.2 | 3,251 | 49.7 | 1,721 | 46.7 | 4,896 | 46.3 | 1,916 | 47.5 | 1,446 | 37.4 |
| Women | 23,281 | 53.2 | 7,804 | 51.8 | 3,291 | 50.3 | 1,968 | 53.3 | 5,681 | 53.7 | 2,121 | 52.5 | 2,416 | 62.6 |
| **Age (years)** |  |  |  |  |  |  |  |  |  |  |  |  |  |  |
| 65–69 | 13,006 | 29.7 | 5,880 | 39.0 | 2,298 | 35.1 | 1,247 | 33.8 | 2,157 | 20.4 | 734 | 18.2 | 690 | 17.9 |
| 70–74 | 13,098 | 29.9 | 4,998 | 33.2 | 2,037 | 31.1 | 1,180 | 32.0 | 2,793 | 26.4 | 1,073 | 26.6 | 1,017 | 26.3 |
| 75–79 | 9,748 | 22.3 | 2,770 | 18.4 | 1,340 | 20.5 | 772 | 20.9 | 2,717 | 25.7 | 1,079 | 26.7 | 1,070 | 27.7 |
| 80–84 | 5,462 | 12.5 | 1,107 | 7.3 | 641 | 9.8 | 379 | 10.3 | 1,868 | 17.7 | 722 | 17.9 | 745 | 19.3 |
| ≥85 | 2,460 | 5.6 | 312 | 2.1 | 226 | 3.5 | 111 | 3.0 | 1,042 | 9.9 | 429 | 10.6 | 340 | 8.8 |
| **Income (million JPY)** |  |  |  |  |  |  |  |  |  |  |  |  |  |  |
| <2.00 | 17,910 | 40.9 | 5,438 | 36.1 | 2,572 | 39.3 | 1,642 | 44.5 | 4,612 | 43.6 | 2,037 | 50.5 | 1,609 | 41.7 |
| 2.00–3.99 | 14,391 | 32.9 | 5,944 | 39.5 | 2,426 | 37.1 | 1,155 | 31.3 | 3,171 | 30.0 | 857 | 21.2 | 838 | 21.7 |
| ≥4.00 | 4,065 | 9.3 | 1,776 | 11.8 | 671 | 10.3 | 281 | 7.6 | 871 | 8.2 | 222 | 5.5 | 244 | 6.3 |
| Missing | 7,408 | 16.9 | 1,909 | 12.7 | 873 | 13.3 | 611 | 16.6 | 1,923 | 18.2 | 921 | 22.8 | 1,171 | 30.3 |
| **Education (years)** |  |  |  |  |  |  |  |  |  |  |  |  |  |  |
| ≤9 | 19,401 | 44.3 | 5,347 | 35.5 | 2,530 | 38.7 | 1,714 | 46.5 | 5,217 | 49.3 | 2,501 | 62.0 | 2,092 | 54.2 |
| 10–12 | 15,338 | 35.0 | 5,936 | 39.4 | 2,527 | 38.6 | 1,331 | 36.1 | 3,469 | 32.8 | 1,032 | 25.6 | 1,043 | 27.0 |
| ≥13 | 8,021 | 18.3 | 3,524 | 23.4 | 1,396 | 21.3 | 563 | 15.3 | 1,638 | 15.5 | 400 | 9.9 | 500 | 12.9 |
| Missing | 1,014 | 2.3 | 260 | 1.7 | 89 | 1.4 | 81 | 2.2 | 253 | 2.4 | 104 | 2.6 | 227 | 5.9 |
| **Comorbidities** |  |  |  |  |  |  |  |  |  |  |  |  |  |  |
| 0 | 109 | 0.2 | 36 | 0.2 | 10 | 0.2 | 8 | 0.2 | 26 | 0.2 | 12 | 0.3 | 17 | 0.4 |
| 1 | 14,111 | 32.2 | 5,036 | 33.4 | 2,121 | 32.4 | 1,212 | 32.9 | 3,263 | 30.8 | 1,243 | 30.8 | 1,236 | 32.0 |
| ≥2 | 19,228 | 43.9 | 6,198 | 41.1 | 2,856 | 43.7 | 1,516 | 41.1 | 5,053 | 47.8 | 1,783 | 44.2 | 1,822 | 47.2 |
| Missing | 10,326 | 23.6 | 3,797 | 25.2 | 1,555 | 23.8 | 953 | 25.8 | 2,235 | 21.1 | 999 | 24.7 | 787 | 20.4 |
| **Smoking status** |  |  |  |  |  |  |  |  |  |  |  |  |  |  |
| Never | 23,390 | 53.4 | 8,801 | 58.4 | 3,441 | 52.6 | 2,053 | 55.7 | 5,347 | 50.6 | 2,007 | 49.7 | 1,741 | 45.1 |
| Former | 11,731 | 26.8 | 4,204 | 27.9 | 1,985 | 30.3 | 940 | 25.5 | 2,935 | 27.7 | 1,045 | 25.9 | 622 | 16.1 |
| Current | 4,481 | 10.2 | 1,145 | 7.6 | 707 | 10.8 | 423 | 11.5 | 1,326 | 12.5 | 588 | 14.6 | 292 | 7.6 |
| Missing | 4,172 | 9.5 | 917 | 6.1 | 409 | 6.3 | 273 | 7.4 | 969 | 9.2 | 397 | 9.8 | 1,207 | 31.3 |
| **Alcohol consumption** |  |  |  |  |  |  |  |  |  |  |  |  |  |  |
| Never | 24,813 | 56.7 | 8,067 | 53.5 | 3,523 | 53.9 | 2,139 | 58.0 | 6,480 | 61.3 | 2,561 | 63.4 | 2,043 | 52.9 |
| Former | 1,435 | 3.3 | 433 | 2.9 | 231 | 3.5 | 134 | 3.6 | 409 | 3.9 | 137 | 3.4 | 91 | 2.4 |
| Current | 14,996 | 34.3 | 6,060 | 40.2 | 2,551 | 39.0 | 1,294 | 35.1 | 3,186 | 30.1 | 1,159 | 28.7 | 746 | 19.3 |
| Missing | 2,530 | 5.8 | 507 | 3.4 | 237 | 3.6 | 122 | 3.3 | 502 | 4.7 | 180 | 4.5 | 982 | 25.4 |
| **Marital status** |  |  |  |  |  |  |  |  |  |  |  |  |  |  |
| With a spouse | 31,131 | 71.1 | 11,687 | 77.6 | 4,914 | 75.1 | 2,628 | 71.2 | 6,941 | 65.6 | 2,598 | 64.4 | 2,363 | 61.2 |
| Without a spouse | 11,711 | 26.8 | 3,177 | 21.1 | 1,544 | 23.6 | 983 | 26.6 | 3,396 | 32.1 | 1,304 | 32.3 | 1,307 | 33.8 |
| Missing | 932 | 2.1 | 203 | 1.3 | 84 | 1.3 | 78 | 2.1 | 240 | 2.3 | 135 | 3.3 | 192 | 5.0 |
| **Walking time (min/day)** |  |  |  |  |  |  |  |  |  |  |  |  |  |  |
| ≥60 | 12,925 | 29.5 | 4,961 | 32.9 | 2,070 | 31.6 | 1,029 | 27.9 | 2,836 | 26.8 | 1,046 | 25.9 | 983 | 25.5 |
| 30–59 | 14,604 | 33.4 | 5,363 | 35.6 | 2,296 | 35.1 | 1,261 | 34.2 | 3,343 | 31.6 | 1,203 | 29.8 | 1,138 | 29.5 |
| <30 | 13,626 | 31.1 | 4,007 | 26.6 | 1,808 | 27.6 | 1,202 | 32.6 | 3,741 | 35.4 | 1,542 | 38.2 | 1,326 | 34.3 |
| Missing | 2,619 | 6.0 | 736 | 4.9 | 368 | 5.6 | 197 | 5.3 | 657 | 6.2 | 246 | 6.1 | 415 | 10.7 |
| **Body mass index** |  |  |  |  |  |  |  |  |  |  |  |  |  |  |
| <18.5 | 3,047 | 7.0 | 904 | 6.0 | 396 | 6.1 | 224 | 6.1 | 878 | 8.3 | 319 | 7.9 | 326 | 8.4 |
| 18.5–29.9 | 38,490 | 87.9 | 13,666 | 90.7 | 5,896 | 90.1 | 3,296 | 89.3 | 9,040 | 85.5 | 3,431 | 85.0 | 3,161 | 81.8 |
| ≥30.0 | 855 | 2.0 | 266 | 1.8 | 110 | 1.7 | 73 | 2.0 | 223 | 2.1 | 94 | 2.3 | 89 | 2.3 |
| Missing | 1,382 | 3.2 | 231 | 1.5 | 140 | 2.1 | 96 | 2.6 | 436 | 4.1 | 193 | 4.8 | 286 | 7.4 |

**Supplementary Table S3. Baseline characteristics of participants by dental status after multiple imputation.**

|  | **All participants (*n* = 43,774)** | | **Dental status** | | | | | | | | | |
| --- | --- | --- | --- | --- | --- | --- | --- | --- | --- | --- | --- | --- |
|  | **≥20 teeth**  **(*n* = 15,555)** | | **10–19 teeth with dental prostheses**  **(*n* = 7,303)** | | **10–19 teeth without dental prostheses**  **(*n* = 4,139)** | | **0–9 teeth with dental prostheses**  **(*n* = 12,158)** | | **0–9 teeth without dental prostheses**  **(*n* = 4,620)** | |
|  | ***n*** | **%** | ***n*** | **%** | ***n*** | **%** | ***n*** | **%** | ***n*** | **%** | ***n*** | **%** |
| **Sex** |  |  |  |  |  |  |  |  |  |  |  |  |
| Men | 20,493 | 46.8 | 7,471 | 48.0 | 3,535 | 48.4 | 1,878 | 45.4 | 5,484 | 45.1 | 2,125 | 46.0 |
| Women | 23,281 | 53.2 | 8,084 | 52.0 | 3,768 | 51.6 | 2,261 | 54.6 | 6,674 | 54.9 | 2,495 | 54.0 |
| **Age** |  |  |  |  |  |  |  |  |  |  |  |  |
| 65–69 | 13,006 | 29.7 | 6,044 | 38.9 | 2,463 | 33.7 | 1,342 | 32.4 | 2,349 | 19.3 | 808 | 17.5 |
| 70–74 | 13,098 | 29.9 | 5,159 | 33.2 | 2,260 | 30.9 | 1,310 | 31.6 | 3,165 | 26.0 | 1,205 | 26.1 |
| 75–79 | 9,748 | 22.3 | 2,872 | 18.5 | 1,557 | 21.3 | 899 | 21.7 | 3,171 | 26.1 | 1,248 | 27.0 |
| 80–84 | 5,462 | 12.5 | 1,154 | 7.4 | 759 | 10.4 | 454 | 11.0 | 2,238 | 18.4 | 858 | 18.6 |
| ≥85 | 2,460 | 5.6 | 325 | 2.1 | 264 | 3.6 | 134 | 3.2 | 1,236 | 10.2 | 501 | 10.8 |
| **Income**  **(million JPY)** |  |  |  |  |  |  |  |  |  |  |  |  |
| <2.00 | 17,910 | 40.9 | 6,528 | 42.0 | 3,420 | 46.8 | 2,267 | 54.8 | 6,730 | 55.4 | 3,042 | 65.8 |
| 2.00–3.99 | 14,391 | 32.9 | 6,950 | 44.7 | 3,036 | 41.6 | 1,503 | 36.3 | 4,294 | 35.3 | 1,273 | 27.6 |
| ≥4.00 | 4,065 | 9.3 | 2,077 | 13.4 | 847 | 11.6 | 369 | 8.9 | 1,134 | 9.3 | 305 | 6.6 |
| **Education (years)** |  |  |  |  |  |  |  |  |  |  |  |  |
| ≤9 | 19,401 | 44.3 | 5,618 | 36.1 | 2,964 | 40.6 | 2,031 | 49.1 | 6,334 | 52.1 | 2,974 | 64.4 |
| 10–12 | 15,338 | 35.0 | 6,221 | 40.0 | 2,803 | 38.4 | 1,481 | 35.8 | 3,980 | 32.7 | 1,192 | 25.8 |
| ≥13 | 8,021 | 18.3 | 3,715 | 23.9 | 1,537 | 21.0 | 627 | 15.1 | 1,844 | 15.2 | 453 | 9.8 |
| **Comorbidities** |  |  |  |  |  |  |  |  |  |  |  |  |
| 0 | 109 | 0.2 | 51 | 0.3 | 20 | 0.3 | 16 | 0.4 | 40 | 0.3 | 19 | 0.4 |
| 1 | 14,111 | 32.2 | 7,059 | 45.4 | 3,141 | 43.0 | 1,869 | 45.1 | 4,835 | 39.8 | 1,931 | 41.8 |
| ≥2 | 19,228 | 43.9 | 8,444 | 54.3 | 4,142 | 56.7 | 2,254 | 54.5 | 7,284 | 59.9 | 2,670 | 57.8 |
| **Smoking status** |  |  |  |  |  |  |  |  |  |  |  |  |
| Never | 23,390 | 53.4 | 9,801 | 63.0 | 4,219 | 57.8 | 2,559 | 61.8 | 7,002 | 57.6 | 2,659 | 57.6 |
| Former | 11,731 | 26.8 | 4,513 | 29.0 | 2,265 | 31.0 | 1,095 | 26.5 | 3,557 | 29.3 | 1,271 | 27.5 |
| Current | 4,481 | 10.2 | 1,240 | 8.0 | 819 | 11.2 | 485 | 11.7 | 1,599 | 13.2 | 690 | 14.9 |
| **Alcohol consumption** |  |  |  |  |  |  |  |  |  |  |  |  |
| Never | 24,813 | 56.7 | 8,654 | 55.6 | 4,160 | 57.0 | 2,524 | 61.0 | 7,931 | 65.2 | 3,105 | 67.2 |
| Former | 1,435 | 3.3 | 464 | 3.0 | 265 | 3.6 | 152 | 3.7 | 477 | 3.9 | 160 | 3.5 |
| Current | 14,996 | 34.3 | 6,437 | 41.4 | 2,878 | 39.4 | 1,463 | 35.3 | 3,750 | 30.8 | 1,355 | 29.3 |
| **Marital status** |  |  |  |  |  |  |  |  |  |  |  |  |
| With a spouse | 31,131 | 71.1 | 12,203 | 78.4 | 5,489 | 75.2 | 2,973 | 71.8 | 8,050 | 66.2 | 3,027 | 65.5 |
| Without a spouse | 11,711 | 26.8 | 3,352 | 21.6 | 1,814 | 24.8 | 1,165 | 28.2 | 4,108 | 33.8 | 1,593 | 34.5 |
| **Walking time (min/day)** |  |  |  |  |  |  |  |  |  |  |  |  |
| ≥60 | 12,925 | 29.5 | 5,384 | 34.6 | 2,406 | 32.9 | 1,217 | 29.4 | 3,440 | 28.3 | 1,252 | 27.1 |
| 30–59 | 14,604 | 33.4 | 5,807 | 37.3 | 2,695 | 36.9 | 1,475 | 35.7 | 4,083 | 33.6 | 1,472 | 31.9 |
| <30 | 13,626 | 31.1 | 4,363 | 28.1 | 2,202 | 30.2 | 1,446 | 34.9 | 4,635 | 38.1 | 1,896 | 41.0 |
| **Body mass index** |  |  |  |  |  |  |  |  |  |  |  |  |
| <18.5 | 3,047 | 7.0 | 963 | 6.2 | 466 | 6.4 | 268 | 6.5 | 1,085 | 8.9 | 399 | 8.6 |
| 18.5–29.9 | 38,490 | 87.9 | 14,314 | 92.0 | 6,711 | 91.9 | 3,787 | 91.5 | 10,800 | 88.8 | 4,105 | 88.9 |
| ≥30.0 | 855 | 2.0 | 278 | 1.8 | 125 | 1.7 | 83 | 2.0 | 274 | 2.3 | 116 | 2.5 |

**Supplementary Table S4. All-cause and cause-specific mortality rates by number of remaining teeth (*n* = 43,774).**

| **Mortality rate**  **(per 1,000 person-years)** | **Number of remaining teeth** | | |
| --- | --- | --- | --- |
| **≥20 teeth**  **(*n* = 15,555)** | **10–19 teeth**  **(*n* = 11,441)** | **0–19 teeth**  **(n = 16,778)** |
| **All-cause mortality** | 13.0 | 18.2 | 29.9 |
| **Cause-specific mortality** |  |  |  |
| Cancer | 6.2 | 7.9 | 11.6 |
| Cardiovascular diseases | 2.8 | 4.1 | 7.1 |
| Respiratory diseases | 1.5 | 2.4 | 4.6 |
| Infectious and parasitic diseases | 0.3 | 0.3 | 0.7 |
| Endocrine, nutritional, and metabolic diseases | 0.1 | 0.2 | 0.3 |
| Mental and behavioral disorders | 0.0 | 0.1 | 0.1 |
| Nervous diseases | 0.2 | 0.3 | 0.5 |
| Digestive diseases | 0.3 | 0.5 | 1.0 |
| Genitourinary diseases | 0.2 | 0.3 | 0.6 |
| Injury, poisoning, and external causes | 0.6 | 0.9 | 1.5 |

**Supplementary Table S5. Association between number of remaining teeth and all-cause and cause-specific mortality in complete-case analyses (*n* = 21,829).**

|  | **Number of remaining teeth**  **Ref. HR = 1: ≥20 teeth (*n* = 8,584)** | | | |
| --- | --- | --- | --- | --- |
|  | **10–19 teeth**  **(*n* = 5,684)** | | **0–9 teeth**  **(*n* = 7,561)** | |
|  | **Crude model** | **Adjusted model a** | **Crude model** | **Adjusted model a** |
|  | **HR (95% CI)** | **HR (95% CI)** | **HR (95% CI)** | **HR (95% CI)** |
| **All-cause mortality** | 1.35 (1.22-1.50)*** | 1.15 (1.03-1.27)* | 2.18 (2.00-2.38)*** | 1.36 (1.24-1.49)*** |
| **Cause-specific mortality** |  |  |  |  |
| Cancer | 1.22 (1.05-1.42)* | 1.08 (0.92-1.25) | 1.77 (1.56-2.02)*** | 1.28 (1.12-1.47)*** |
| Cardiovascular diseases | 1.43 (1.15-1.78)** | 1.19 (0.96-1.49) | 2.39 (1.98-2.88)*** | 1.38 (1.13-1.68)** |
| Respiratory diseases | 1.49 (1.10-2.01)** | 1.18 (0.87-1.60)* | 3.05 (2.38-3.92)*** | 1.52 (1.17-1.98)** |
| Infectious and parasitic diseases | 1.17 (0.57-2.41) | 0.95 (0.46-1.97) | 2.18 (1.21-3.94)* | 1.16 (0.62-2.17) |
| Endocrine, nutritional, and metabolic diseases | 1.84 (0.56-6.02) | 1.45 (0.44-4.78) | 4.81 (1.80-12.81)** | 2.41 (0.87-6.68) |
| Mental and behavioral disorders | 4.67 (0.94-23.12) | 3.83 (0.76-19.31) | 3.81 (0.77-18.89) | 2.35 (0.46-12.16) |
| Nervous diseases | 0.98 (0.42-2.26) | 0.90 (0.39-2.09) | 1.88 (0.96-3.67) | 1.39 (0.68-2.84) |
| Digestive diseases | 1.86 (1.00-3.46) | 1.50 (0.80-2.81) | 2.88 (1.67-4.99)*** | 1.73 (0.98-3.08) |
| Genitourinary diseases | 1.41 (0.66-3.01) | 1.05 (0.49-2.23) | 2.46 (1.30-4.65)** | 1.03 (0.53-2.02) |
| Injury, poisoning, and external causes | 1.61 (1.00-2.60)* | 1.43 (0.89-2.31) | 2.21 (1.45-3.37)*** | 1.59 (1.02-2.48)* |

Abbreviations: HR, hazard ratio; 95% CI, 95% confidence interval; Ref, reference.

a Adjusted for sex, age, equivalent income, education, comorbidities, smoking status, alcohol consumption, marital status, walking time, and body mass index.

*p < 0.05, ** p < 0.01, *** p < 0.001.

**Supplementary Table S6. Associations between dental status and all-cause and cause-specific mortality in complete-case analyses (*n* = 21,829).**

|  | **Dental status**  **Ref. HR = 1: ≥20 teeth (*n* = 8,584)** | | | | | | | |
| --- | --- | --- | --- | --- | --- | --- | --- | --- |
|  | **10–19 teeth with dental prostheses (*n* = 3,742)** | | **10–19 teeth without dental prostheses (*n* = 1,942)** | | **0–9 teeth with dental prostheses (*n* = 5,656)** | | **0–9 teeth without dental prostheses (*n* = 1,905)** | |
|  | **Crude model** | **Adjusted model a** | **Crude model** | **Adjusted model a** | **Crude model** | **Adjusted model a** | **Crude model** | **Adjusted model a** | |
|  | **HR**  **(95% CI)** | **HR**  **(95% CI)** | **HR**  **(95% CI)** | **HR**  **(95% CI)** | **HR**  **(95% CI)** | **HR**  **(95% CI)** | **HR**  **(95% CI)** | **HR**  **(95% CI)** | |
| **All-cause mortality** | 1.31  (1.16-1.47)*** | 1.11  (0.99-1.25) | 1.44  (1.25-1.66)*** | 1.21  (1.05-1.40)** | 2.16  (1.97-2.38)*** | 1.36  (1.23-1.50)*** | 2.22  (1.96-2.52)*** | 1.35  (1.19-1.54)*** | |
| **Cause-specific mortality** |  |  |  |  |  |  |  |  | |
| Cancer | 1.14  (0.95-1.36) | 1.00  (0.84-1.20) | 1.38  (1.12-1.70)** | 1.22  (0.99-1.50) | 1.78  (1.55-2.04)*** | 1.30  (1.12-1.50)*** | 1.75  (1.45-2.13)*** | 1.25  (1.02-1.53)* | |
| Cardiovascular diseases | 1.47  (1.15-1.87)** | 1.22  (0.96-1.56) | 1.37  (1.00-1.87) | 1.13  (0.83-1.55) | 2.44  (2.01-2.97)*** | 1.42  (1.15-1.74)** | 2.24  (1.71-2.92)*** | 1.26  (0.95-1.67) | |
| Respiratory diseases | 1.43  (1.02-2.01)* | 1.16  (0.82-1.63) | 1.61  (1.07-2.43)* | 1.23  (0.82-1.86) | 2.92  (2.24-3.79)*** | 1.48  (1.13-1.96)** | 3.47  (2.50-4.80)*** | 1.64  (1.16-2.30)** | |
| Infectious and parasitic diseases | 1.23  (0.55-2.76) | 0.99  (0.44-2.24) | 1.06  (0.36-3.14) | 0.87  (0.29-2.61) | 1.97  (1.04-3.74) * | 1.04  (0.53-2.04) | 2.80  (1.28-6.11)* | 1.51  (0.67-3.43) | |
| Endocrine, nutritional, and metabolic diseases | 1.86  (0.50-6.92) | 1.51  (0.40-5.66) | 1.80  (0.35-9.26) | 1.35  (0.26-7.01) | 3.86  (1.36-10.95)* | 2.02  (0.69-5.94) | 7.64  (2.50-23.35)*** | 3.49  (1.09-11.15)* | |
| Mental and behavioral disorders | 4.79  (0.88-26.15) | 4.05  (0.73-22.55) | 4.44  (0.63-31.52) | 3.41  (0.47-24.69) | 4.24  (0.82-21.86) | 2.63  (0.49-14.05) | 2.53  (0.23-27.91) | 1.53  (0.13-17.61) | |
| Nervous diseases | 0.83  (0.30-2.30) | 0.76  (0.27-2.11) | 1.26  (0.42-3.84)* | 1.19  (0.39-3.63) | 1.83  (0.89-3.75) | 1.37  (0.64-2.91) | 2.02  (0.78-5.25) | 1.47  (0.54-3.99) | |
| Digestive diseases | 2.18  (1.13-4.24)* | 1.80  (0.92-3.50) | 1.23  (0.46-3.31) | 0.95  (0.35-2.57) | 3.25  (1.85-5.71)*** | 1.98  (1.10-3.56)* | 1.81  (0.75-4.33) | 0.99  (0.00-2.43) | |
| Genitourinary diseases | 0.99  (0.38-2.58) | 0.75  (0.29-1.97) | 2.22  (0.90-5.51) | 1.58  (0.64-3.95) | 1.93  (0.95-3.92) | 0.83  (0.40-1.72) | 4.02  (1.86-8.68)*** | 1.66  (0.74-3.72) | |
| Injury, poisoning, and external causes | 1.54  (0.90-2.64) | 1.37  (0.80-2.36) | 1.75  (0.92-3.33) | 1.56  (0.82-2.98) | 2.05  (1.30-3.23)** | 1.49  (0.93-2.40) | 2.68  (1.52-4.71)** | 1.89  (1.05-3.41)* | |

Abbreviations: HR, hazard ratio; 95% CI, 95% confidence interval; Ref, reference.

a Adjusted for sex, age, equivalent income, education, comorbidities, smoking status, alcohol consumption, marital status, walking time, and body mass index.

*p < 0.05, ** p < 0.01, *** p < 0.001.
